# Supplementary material
Source: PubMed Central journal article supplement (PMC2483378)
Supplement: tpc.108.058578_1.pdf [file tpc.108.058578_1.pdf]

Supplemental Data. Arimura et al. (2008). *Arabidopsis* ELONGATED MITOCHONDRIA 1 is required for localization of DYNAMIN-RELATED PROTEIN 3A to mitochondrial fission sites.

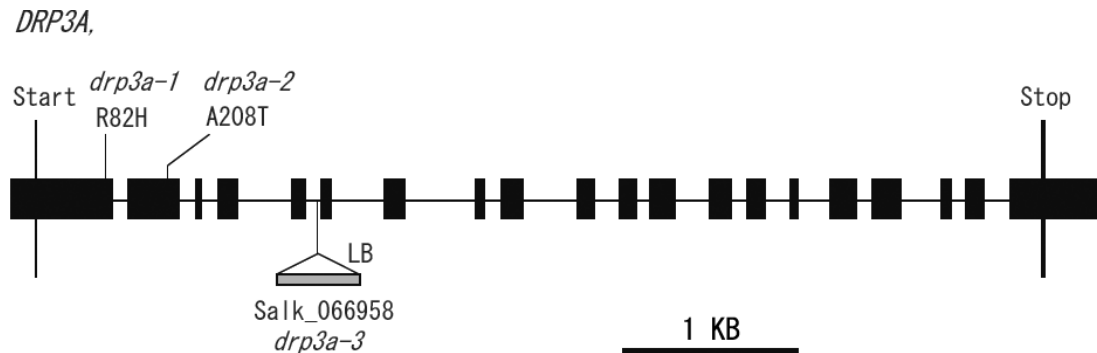

Supplemental Figure 1. Two mutants with elongated mitochondria have nucleotide substitutions in the *DRP3A* gene.

The point mutation sites and corresponding amino acid substitutions resulting in *drp3a-1* and *drp3a-2* are shown in a scheme of the *DRP3A* gene. R in position 82 of the wild type is replaced with H in *drp3a-1* and A in position 208 of the wild type is replaced with T in *drp3a-2*.

Boxes indicate exons, and solid lines indicate introns. A T-DNA-tagging allele (*drp3a-3*) is also shown.

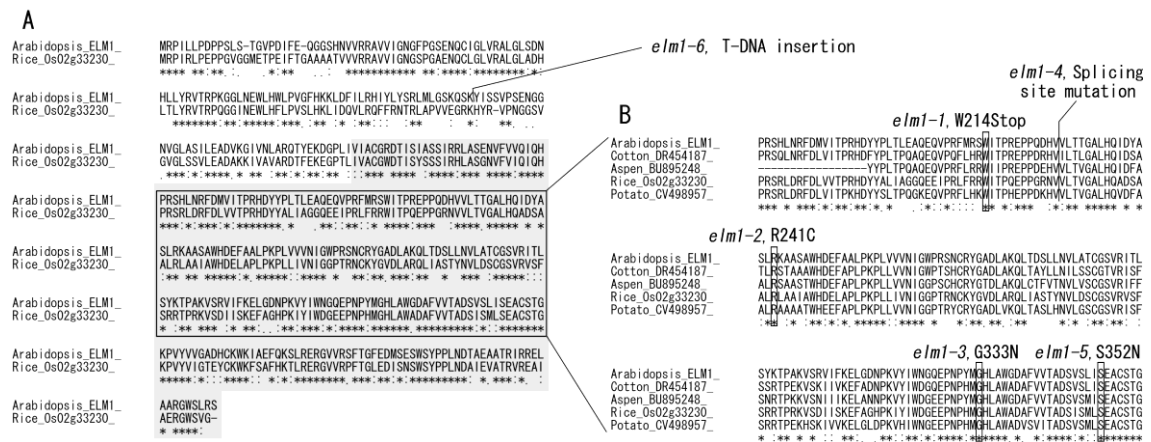

Supplemental Figure 2. Amino acid sequence alignments of ELM1 and its homologues in other plants.

A. An alignment between deduced amino acid sequences of *Arabidopsis* ELM1 and Rice Os02g33230 (identity 62.8% and similarity 86.7%). Shaded area shows the region similar to the bacterial sequences. B. A partial alignment between deduced amino acid sequences of *Arabidopsis* ELM1, Rice Os02g33230, cotton EST (*Gossypium hirsutum*, accession no. DR454187), aspen EST (*Populus tremula* x *Populus tremuloides*, BU895248) and potato EST (*Solanum tuberosum*, CV498957). An NCBI tblastn search for sequences similar to ELM1 found many ESTs from spermatophytes (seed plants) including eudicots, monocots and conifers, all with e values <1e-75. The aligned region in B matches to the region boxed in A. The mutated amino acids (and deduced splice defected region) in 5 *elm1* alleles are shown. Identical amino acids are marked with ‘\*’, and similar amino acids are indicated with ‘:’ and ‘.’ at their bottoms. “:” means that conserved substitutions have been observed. “.” means that semi-conserved substitutions are observed.

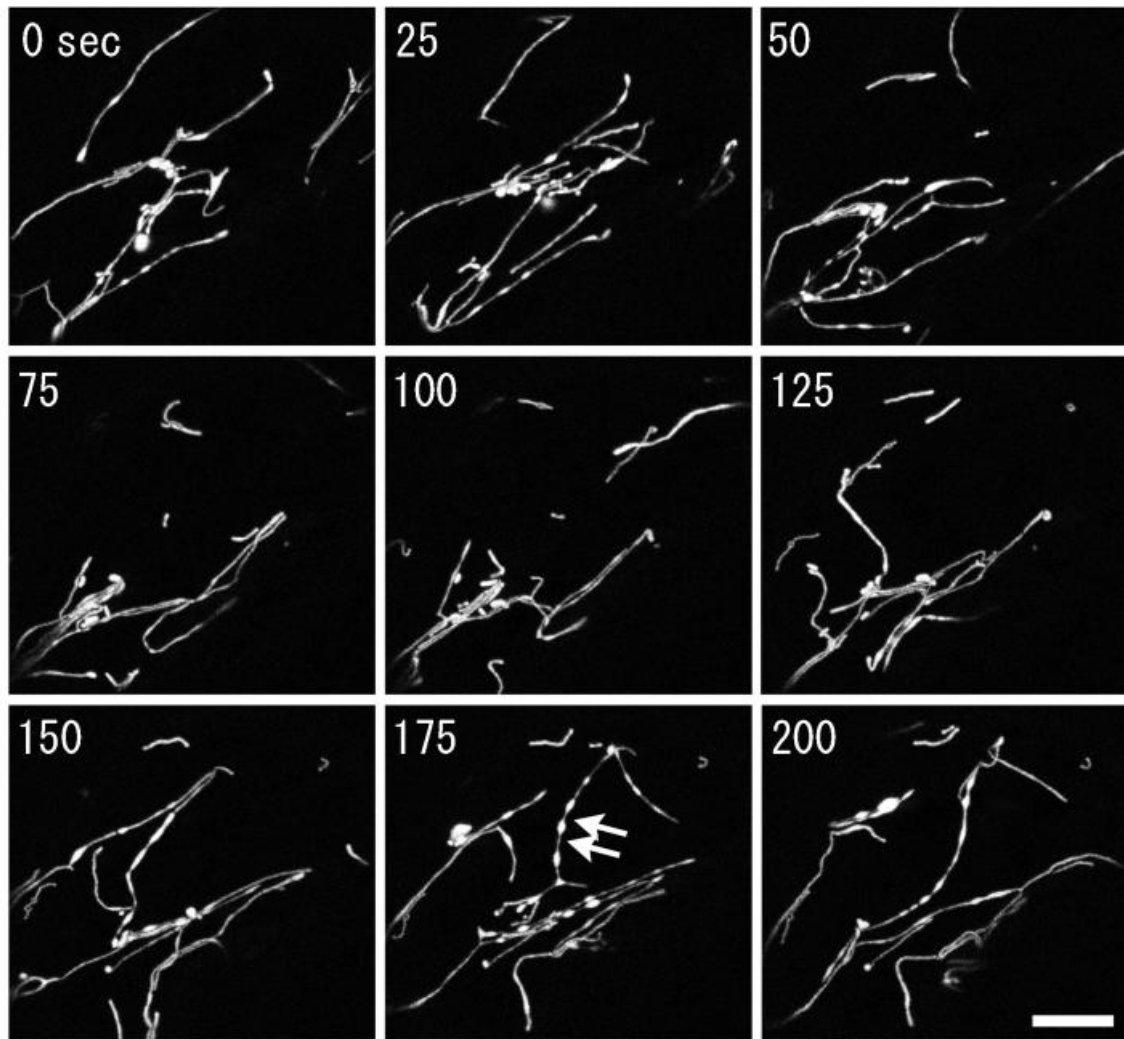

Supplemental Figure 3. Mitochondria in *elm1-1* move and change their morphology.

Time course serial images of mitochondria (labeled with Mt-GFP) in *elm1-1* were taken by confocal laser scanning microscopy. Numbers in each figure show seconds after the start of the observation. Scale bar shows 10  $\mu\text{m}$ . All 60 images taken at 5-second intervals are shown in Supplemental movie 1 online. Arrows in the 175-second frame indicate constriction sites in mitochondria with a beads-on-a-string shape.

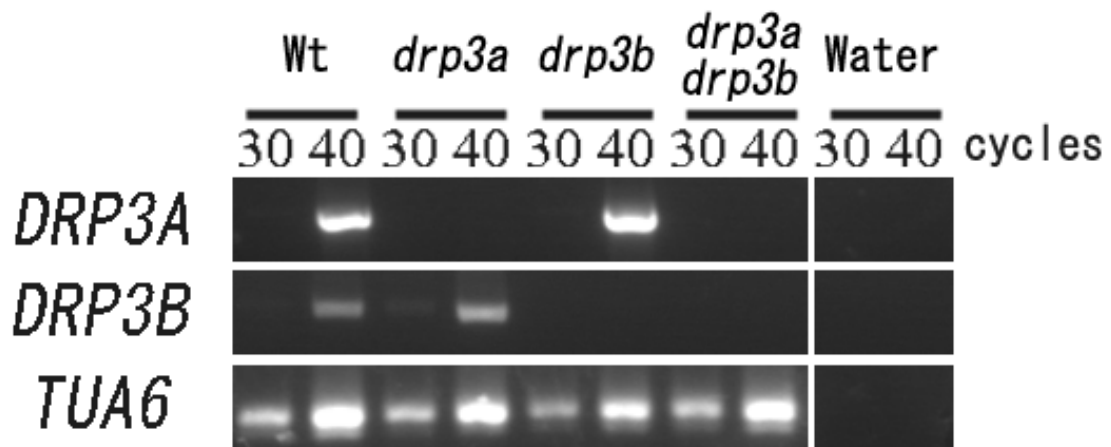

Supplemental Figure 4. Full-length ORF transcripts of *DRP3A* and *DRP3B* were not detected in T-DNA insertion mutants.

RT-PCR of *DRP3A*, *DRP3B* and *TUA6* ( $\alpha$  Tubulin 6, an internal control) in wild-type (Wt) and mutant (*drp3a*, *drp3b* and *drp3a drp3b*) plants. *drp3a* refers to *drp3a-3*.

Primer sets used here are shown in Supplemental Table 1 online. This is a representative data set of 3 biological and 2 technical repeats. DNA in gels was stained by Sybr Gold (Invitrogen).

Supplemental Table 1. Oligonucleotide primer sequences.

| Primer name     | Gene                  | Sequence (5'-3')                    | Purpose                              |
|-----------------|-----------------------|-------------------------------------|--------------------------------------|
| NP350TOPOF0     | <i>ELM1</i>           | CACCTTAACGATTCTTGTCTCC              | Genomic ELM1 and<br>ELM1pro:ELM1:GFP |
| NP350TOPOR0     | <i>ELM1</i>           | GGTCACGTGCGTGAAACATTG               | Genomic ELM1                         |
| NP350G TOPOr-2  | <i>ELM1</i>           | AGACCGTAAACTCCATCCAC                | ELM1pro:ELM1:GFP                     |
| 350 TOPO Fw     | <i>ELM1</i>           | CACCATGAGGCCAATCCTATTGCC            | ORF cloning, Yeast 2 Hybrid          |
| 350 RvT         | <i>ELM1</i>           | TCAAGACCGTAAACTCCATCC               | ORF cloning, Yeast 2 Hybrid          |
| FIS1aTOPOfw     | <i>BIGYIN</i>         | CACCATGGATGCTAAGATCGGAC             | ORF cloning, Yeast 2 Hybrid          |
| FIS1aTr1rv      | <i>BIGYIN</i>         | TCACTTTGTGATTTTGTCTTCGA             | ORF cloning, Yeast 2 Hybrid          |
| TUA6fw          | <i>α Tubulin</i><br>6 | ATGAGAGAGTGCATTTGATC                | RT-PCR                               |
| TUA6rv          | <i>α Tubulin</i><br>6 | TAGTATTCCTCTCCTTCATC                | RT-PCR                               |
| ADL2b B1 Fw     | <i>DRP3B</i>          | AAAAAGCAGGCTCAATGTCCGTCGACGATCTCCC  | ORF cloning, Yeast 2 Hybrid          |
| ADL2b B2 RevT   | <i>DRP3B</i>          | AGAAAGCTGGGTTTTACATATGAAGCCGTCGGT   | ORF cloning, Yeast 2 Hybrid          |
| ADL2a B1 FW     | <i>DRP3A</i>          | AAAAAGCAGGCTCGATGACTATTGAAGAAGTTTC  | ORF cloning, Yeast 2 Hybrid          |
| ADL2a B2 RevT   | <i>DRP3A</i>          | AGAAAGCTGGGTTTGAATCCGATCCATTTTG     | ORF cloning, Yeast 2 Hybrid          |
| Salk T-DNA LBb1 | <i>T-DNA</i>          | GCGTGGACCGCTTGCTGCAACT              | T-DNA                                |
| ADL2a Ex7 Fw    | <i>DRP3A</i>          | GGTGAATTAACAGAATCAAGG               | RT-PCR                               |
| ADL2a Ex8 Rev   | <i>DRP3A</i>          | CTTCACAGTATTTGGAGAG                 | RT-PCR                               |
| ADL2abF4        | <i>DRP3B</i>          | TACTATGACATTGTAAGGAAGAAT            | RT-PCR                               |
| ADL2bR1         | <i>DRP3B</i>          | TTAGAATCCGTATCCATTTTG               | RT-PCR                               |
| DRP3A pro B1fw2 | <i>DRP3A</i>          | AAAAAGCAGGCTGTTGGGTATGACAAGTGAGTC   | DRP3Apro:DRP3A:GFP                   |
| nP DRP3A rv     | <i>DRP3A</i>          | TCTTCAATAGTCATCGTTGGATCGGATTTTGAATG | DRP3Apro:DRP3A:GFP                   |
| nP DRP3A fw     | <i>DRP3A</i>          | AATCCGATCCAACGATGACTATTGAAGAAGTTTCC | DRP3Apro:DRP3A:GFP                   |
| DRP3A B2 RevG   | <i>DRP3A</i>          | AGAAAGCTGGGTAGAATCCGATCCATTTTG      | DRP3Apro:DRP3A:GFP                   |
